# Supplementary material for: dlx and sp6-9 Control Optic Cup Regeneration in a Prototypic Eye
Source: PubMed Central journal article supplement (PMC3154955; doi:10.1371/journal.pgen.1002226), 2011-08-11

Supporting Information Figure S7

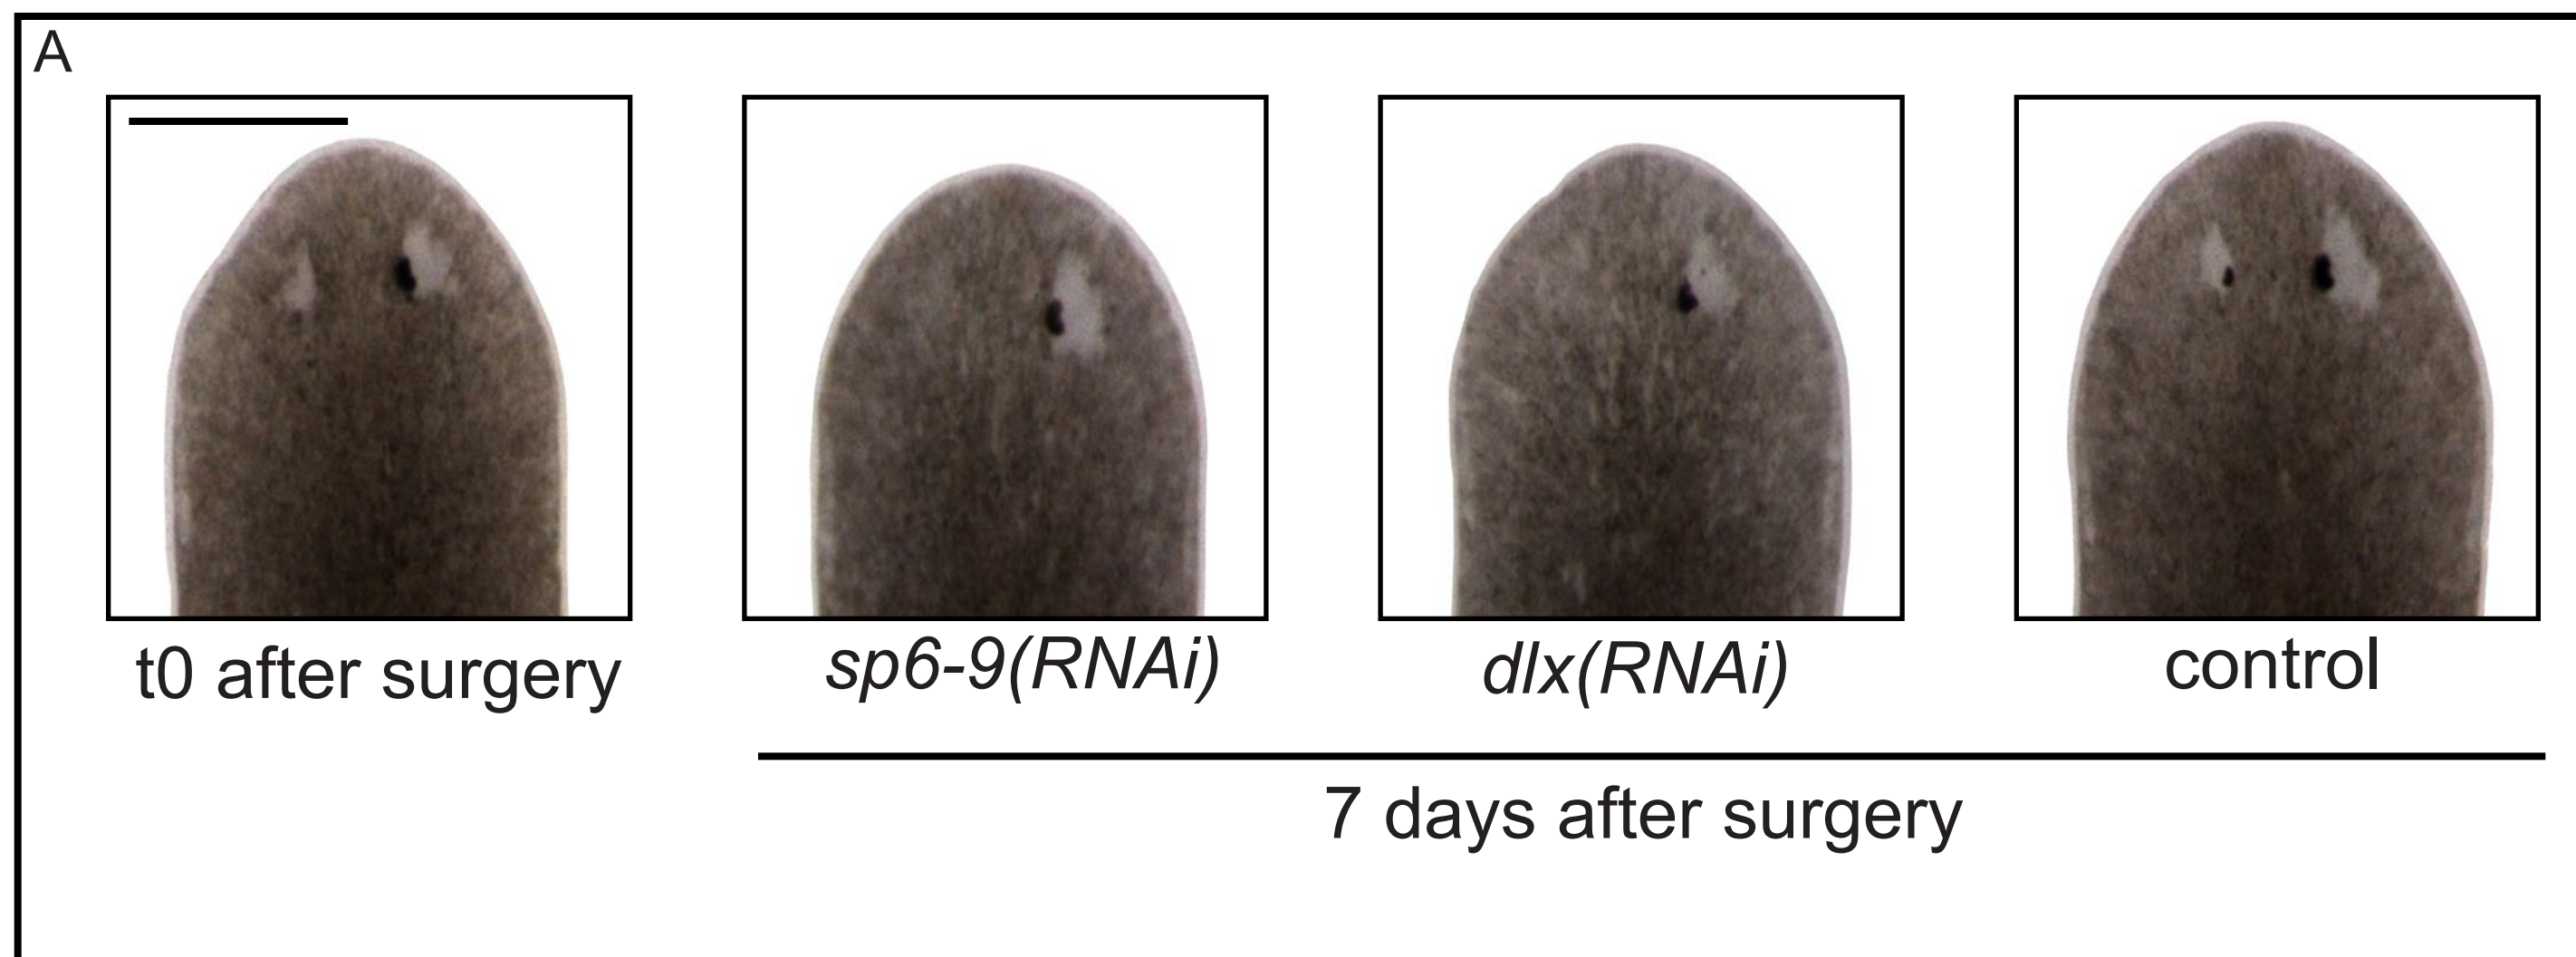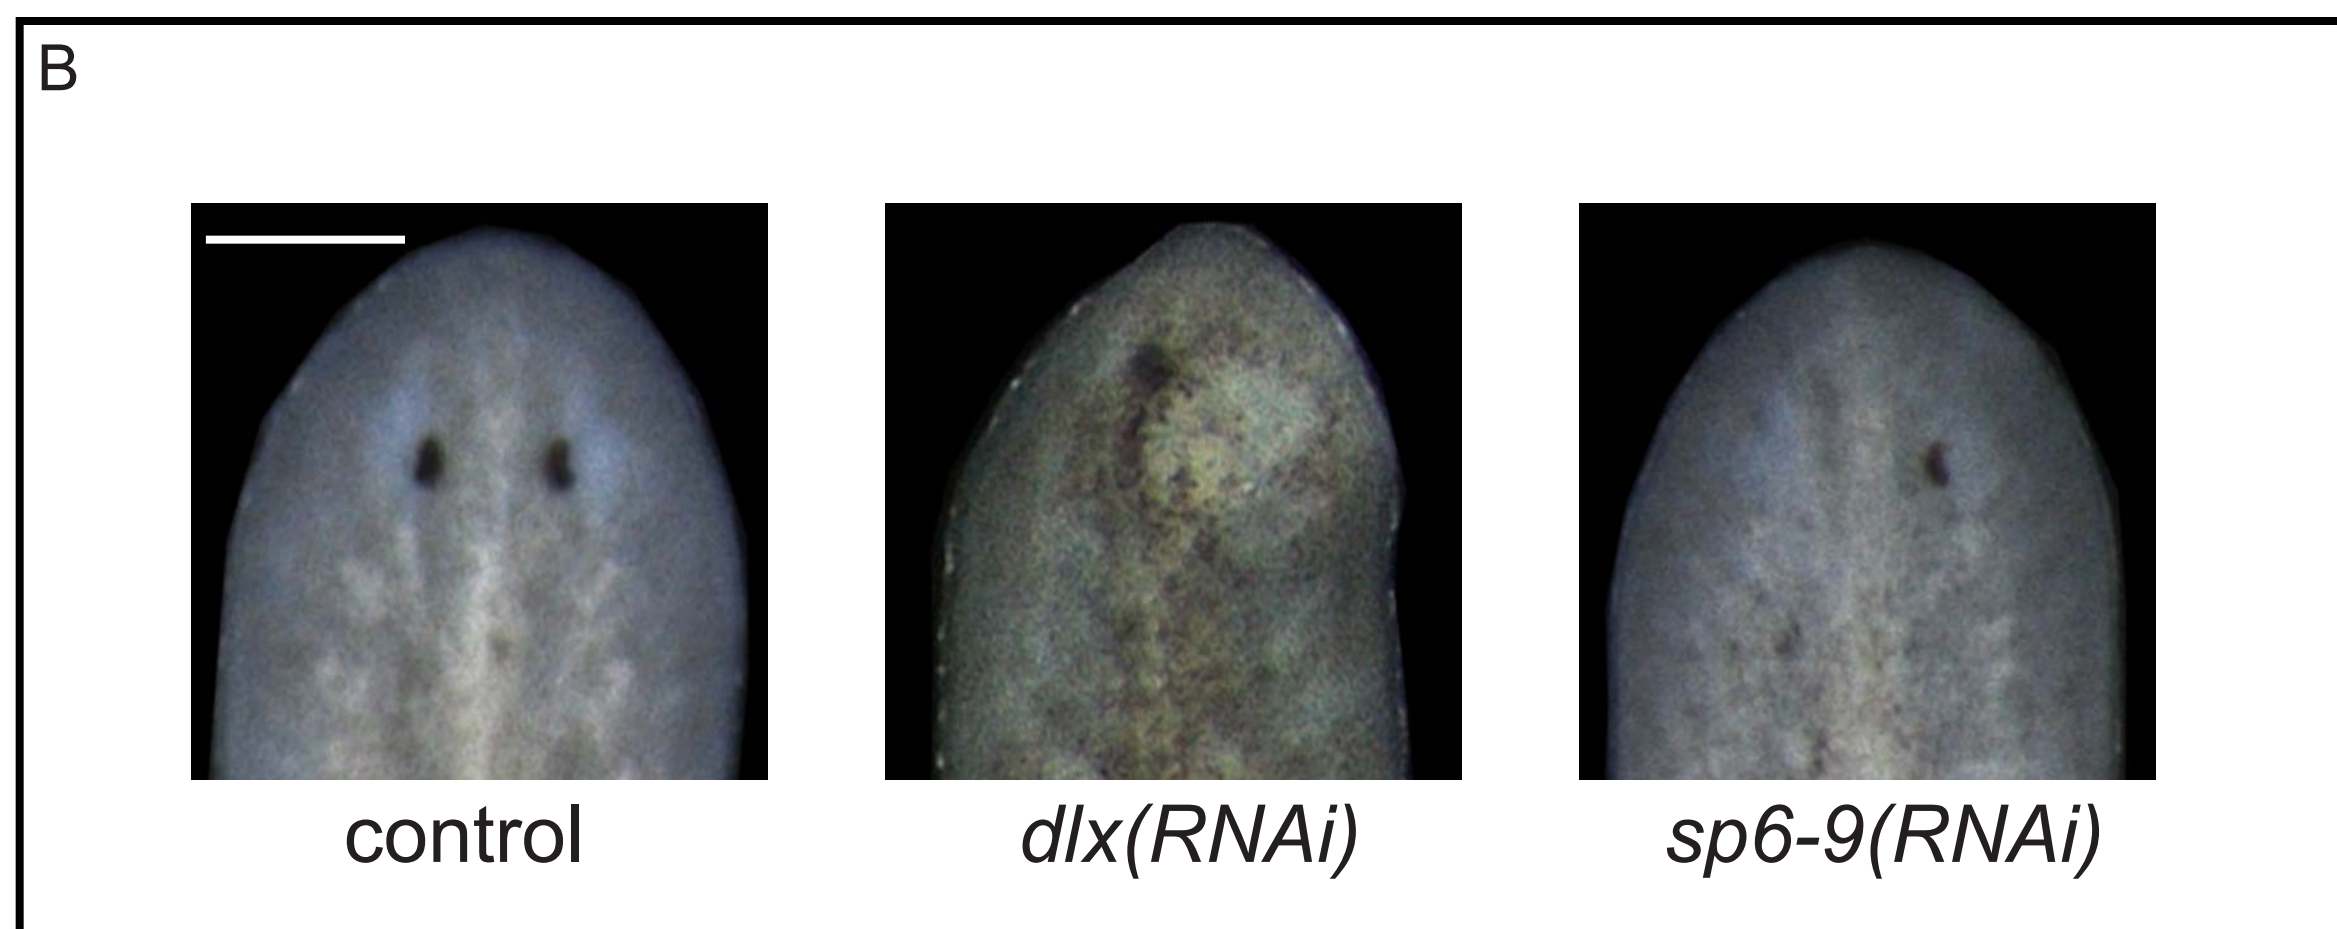

Supplement: pgen.1002226.s007.pdf [file pgen.1002226.s007.pdf]
